# Supplementary material
Source: PubMed Central journal article supplement (PMC5536245)
Supplement: NIHMS869678-supplement-Revised_Online_Supplement.pdf [file NIHMS869678-supplement-Revised_Online_Supplement.pdf]

## ONLINE SUPPLEMENT

### **Genetic drivers of von Willebrand Factor levels in an ischemic stroke population and association with risk for recurrent stroke.**

Stephen R Williams, Ph.D.,<sup>1\*</sup> Fang-Chi Hsu, Ph.D.,<sup>2\*</sup> Keith L Keene, Ph.D.,<sup>6,7</sup> Wei-Min Chen, Ph.D.,<sup>3,4</sup> Godfrey Dzhivhuho,<sup>8</sup> Joe L Rowles III,<sup>9</sup> Andrew M Southerland, M.D., M.Sc.,<sup>1,3</sup> Karen L Furie, MD, MPH,<sup>10</sup> Stephen S Rich, Ph.D.,<sup>3,4</sup> Bradford B Worrall, M.D., M.Sc.,<sup>1,3,4#</sup> and Michèle M Sale, Ph.D.,<sup>3, 4,#</sup> The Genomics and Randomized Trials Network (GARNET) Collaborative Research Group

<sup>1</sup>Department of Neurology University of Virginia, Charlottesville, VA

<sup>2</sup> Department of Biostatistical Sciences, Wake Forest School of Medicine, Winston-Salem, NC

<sup>3</sup> Department of Public Health Sciences, University of Virginia, Charlottesville, VA

<sup>4</sup>Center for Public Health Genomics, University of Virginia, Charlottesville, VA

<sup>5</sup>Department of Biochemistry and Molecular Genetics, University of Virginia, Charlottesville, VA

<sup>6</sup>Department of Biology, East Carolina University, Greenville, NC

<sup>7</sup>Center for Health Disparities, East Carolina University, Greenville, NC

<sup>8</sup>Department of Clinical Laboratory Sciences, University of Cape Town, Cape Town, South Africa

<sup>9</sup> Division of Nutritional Sciences, University of Illinois at Urbana-Champaign, Urbana, IL

<sup>10</sup>Rhode Island Hospital and the Alpert Medical School, Brown University, Providence, RI

#These authors jointly and equally directed this work

\*These authors contributed equally to this work

Correspondence to:

Michèle M. Sale, PhD

Center for Public Health Genomics and Department of Public Health Sciences

University of Virginia, Charlottesville, VA 22908

PO Box 800717

Phone: 434-982-0368

Fax: 434.982.1726

**Supplemental Table I. Full list of SNPs associated with vWF in VISP.**

| CHR | SNP       | BP        | A1 | A2 | FRQ    | IQ     | BETA    | SE     | P        |
|-----|-----------|-----------|----|----|--------|--------|---------|--------|----------|
| 9   | rs505922  | 136149229 | C  | T  | 0.636  | 0.9734 | -0.3315 | 0.0285 | 2.32E-30 |
| 9   | rs687289  | 136137106 | A  | G  | 0.6228 | 0.9788 | -0.3284 | 0.0283 | 3.93E-30 |
| 9   | rs554833  | 136147160 | C  | T  | 0.3777 | 0.9697 | 0.3291  | 0.0284 | 5.47E-30 |
| 9   | rs687621  | 136137065 | A  | G  | 0.3783 | 0.9759 | 0.3275  | 0.0284 | 6.83E-30 |
| 9   | rs529565  | 136149500 | C  | T  | 0.6352 | 0.9549 | -0.3315 | 0.0288 | 1.09E-29 |
| 9   | rs491626  | 136144873 | C  | T  | 0.3777 | 0.9575 | 0.3297  | 0.0287 | 1.59E-29 |
| 9   | rs545971  | 136143372 | C  | T  | 0.3819 | 0.9743 | 0.3229  | 0.0284 | 5.92E-29 |
| 9   | rs492488  | 136144960 | A  | G  | 0.6178 | 0.976  | -0.3226 | 0.0284 | 5.93E-29 |
| 9   | rs495203  | 136145240 | C  | T  | 0.3819 | 0.9767 | 0.3225  | 0.0284 | 5.93E-29 |
| 9   | rs493246  | 136144994 | A  | G  | 0.6179 | 0.9764 | -0.3225 | 0.0284 | 6.10E-29 |
| 9   | rs582094  | 136145484 | A  | T  | 0.381  | 0.9781 | 0.3221  | 0.0284 | 6.70E-29 |
| 9   | rs582118  | 136145471 | A  | G  | 0.3809 | 0.9786 | 0.322   | 0.0284 | 6.82E-29 |
| 9   | rs674302  | 136146664 | A  | T  | 0.6185 | 0.9771 | -0.322  | 0.0284 | 6.96E-29 |
| 9   | rs612169  | 136143442 | A  | G  | 0.3802 | 0.9618 | 0.3247  | 0.0287 | 7.92E-29 |
| 9   | rs8176663 | 136144427 | C  | T  | 0.6198 | 0.9699 | -0.3232 | 0.0285 | 8.07E-29 |
| 9   | rs514659  | 136142203 | A  | C  | 0.3813 | 0.9753 | 0.3219  | 0.0284 | 8.72E-29 |
| 9   | rs576125  | 136144309 | A  | G  | 0.7133 | 0.673  | -0.4207 | 0.0372 | 1.06E-28 |
| 9   | rs543040  | 136143000 | A  | T  | 0.3781 | 0.9617 | 0.3238  | 0.0287 | 1.21E-28 |
| 9   | rs676457  | 136146227 | A  | T  | 0.3769 | 0.9582 | 0.3244  | 0.0288 | 1.43E-28 |
| 9   | rs2769071 | 136145974 | A  | G  | 0.3771 | 0.9578 | 0.3244  | 0.0288 | 1.47E-28 |
| 9   | rs677355  | 136146046 | A  | G  | 0.6215 | 0.9498 | -0.3253 | 0.0289 | 1.53E-28 |
| 9   | rs527210  | 136146431 | C  | T  | 0.3745 | 0.9477 | 0.3259  | 0.029  | 1.68E-28 |
| 9   | rs597988  | 136144284 | A  | T  | 0.6287 | 0.934  | -0.3273 | 0.0292 | 3.25E-28 |
| 9   | rs597974  | 136144297 | A  | G  | 0.3681 | 0.9225 | 0.3286  | 0.0295 | 5.37E-28 |
| 9   | rs657152  | 136139265 | A  | C  | 0.6021 | 0.9857 | -0.2993 | 0.028  | 7.22E-26 |
| 9   | rs494242  | 136145118 | C  | T  | 0.4014 | 0.9796 | 0.3     | 0.0281 | 8.07E-26 |
| 9   | rs544873  | 136143212 | A  | G  | 0.6003 | 0.9822 | -0.2995 | 0.0281 | 9.02E-26 |
| 9   | rs643434  | 136142355 | A  | G  | 0.5997 | 0.9854 | -0.2988 | 0.0281 | 9.70E-26 |
| 9   | rs644234  | 136142217 | G  | T  | 0.6012 | 0.9782 | -0.2993 | 0.0282 | 1.35E-25 |
| 9   | rs543968  | 136143121 | C  | T  | 0.6513 | 0.81   | -0.3235 | 0.0321 | 2.76E-23 |
| 9   | rs613534  | 136143120 | A  | G  | 0.3472 | 0.807  | 0.3159  | 0.0322 | 3.45E-22 |
| 9   | rs532436  | 136149830 | A  | G  | 0.799  | 0.9768 | -0.3347 | 0.0345 | 1.01E-21 |
| 9   | rs2519093 | 136141870 | C  | T  | 0.2015 | 0.9662 | 0.3343  | 0.0346 | 1.53E-21 |
| 9   | rs507666  | 136149399 | A  | G  | 0.7995 | 0.9787 | -0.3316 | 0.0345 | 2.36E-21 |
| 9   | rs635634  | 136155000 | C  | T  | 0.21   | 1.01   | 0.3127  | 0.0335 | 2.60E-20 |
| 9   | rs550057  | 136146597 | C  | T  | 0.2609 | 0.9314 | 0.2765  | 0.0323 | 2.29E-17 |
| 9   | rs579459  | 136154168 | C  | T  | 0.7782 | 1.0063 | -0.2819 | 0.033  | 2.46E-17 |
| 9   | rs651007  | 136153875 | C  | T  | 0.2213 | 1.0027 | 0.2825  | 0.0331 | 2.60E-17 |

|   |            |           |   |   |        |        |         |        |          |
|---|------------|-----------|---|---|--------|--------|---------|--------|----------|
| 9 | rs600038   | 136151806 | C | T | 0.7781 | 1.005  | -0.2817 | 0.033  | 2.68E-17 |
| 9 | rs649129   | 136154304 | C | T | 0.2206 | 0.998  | 0.2831  | 0.0332 | 2.76E-17 |
| 9 | rs495828   | 136154867 | G | T | 0.219  | 0.99   | 0.2849  | 0.0334 | 2.88E-17 |
| 9 | rs630510   | 136149581 | A | G | 0.5423 | 0.9644 | 0.237   | 0.0279 | 4.32E-17 |
| 9 | rs630014   | 136149722 | A | G | 0.5433 | 0.9695 | 0.2355  | 0.0279 | 5.64E-17 |
| 9 | rs475419   | 136148231 | C | T | 0.5573 | 0.9855 | 0.2324  | 0.0279 | 1.67E-16 |
| 9 | rs633862   | 136155444 | C | T | 0.5625 | 1.035  | 0.2215  | 0.0273 | 9.70E-16 |
| 9 | rs581107   | 136147702 | C | T | 0.565  | 0.9708 | 0.2276  | 0.0282 | 1.15E-15 |
| 9 | rs660340   | 136147553 | A | G | 0.5617 | 0.9829 | 0.2258  | 0.028  | 1.23E-15 |
| 9 | rs659104   | 136147823 | G | T | 0.4377 | 0.9811 | -0.2259 | 0.028  | 1.28E-15 |
| 9 | rs476410   | 136148368 | C | G | 0.4379 | 0.9854 | -0.2249 | 0.0279 | 1.45E-15 |
| 9 | rs645982   | 136148409 | A | G | 0.5624 | 0.9866 | 0.2246  | 0.0279 | 1.54E-15 |
| 9 | rs473533   | 136148035 | C | T | 0.4371 | 0.9885 | -0.224  | 0.0279 | 1.73E-15 |
| 9 | rs500498   | 136148647 | C | T | 0.4378 | 0.9864 | -0.224  | 0.0279 | 1.87E-15 |
| 9 | rs616154   | 136150466 | C | T | 0.5412 | 0.9385 | 0.2273  | 0.0284 | 2.01E-15 |
| 9 | rs500499   | 136148648 | C | G | 0.4375 | 0.9874 | -0.2236 | 0.0279 | 2.05E-15 |
| 9 | rs559723   | 136150484 | A | G | 0.5108 | 0.9117 | 0.2318  | 0.029  | 2.12E-15 |
| 9 | rs647800   | 136148000 | A | G | 0.577  | 0.9878 | 0.2165  | 0.0281 | 2.12E-14 |
| 9 | rs9650778  | 136184798 | C | T | 0.0873 | 0.6039 | 0.4194  | 0.0631 | 3.80E-11 |
| 9 | rs1633513  | 136140462 | C | T | 0.731  | 1.0018 | 0.2082  | 0.0313 | 3.91E-11 |
| 9 | rs28446901 | 136308796 | C | G | 0.1882 | 0.9107 | 0.2471  | 0.0372 | 3.97E-11 |
| 9 | rs514708   | 136133743 | C | T | 0.2655 | 1.0024 | -0.2055 | 0.0313 | 7.06E-11 |
| 9 | rs8176741  | 136131461 | A | G | 0.9026 | 1.0335 | -0.3059 | 0.0467 | 7.14E-11 |
| 9 | rs641959   | 136133699 | A | C | 0.2658 | 1.0044 | -0.2047 | 0.0313 | 7.85E-11 |
| 9 | rs641943   | 136133714 | A | G | 0.2647 | 0.9982 | -0.2052 | 0.0314 | 8.47E-11 |
| 9 | rs673578   | 136137857 | G | T | 0.7303 | 1.0061 | 0.2033  | 0.0312 | 9.13E-11 |
| 9 | rs8176746  | 136131322 | G | T | 0.0972 | 1.0342 | 0.3044  | 0.0467 | 9.24E-11 |
| 9 | rs8176749  | 136131188 | C | T | 0.0972 | 1.0342 | 0.3044  | 0.0467 | 9.24E-11 |
| 9 | rs8176747  | 136131315 | C | G | 0.0972 | 1.0331 | 0.3043  | 0.0467 | 9.42E-11 |
| 9 | rs8176759  | 136129647 | A | G | 0.9028 | 1.0332 | -0.3042 | 0.0467 | 9.65E-11 |
| 9 | rs1137827  | 136129715 | C | T | 0.0978 | 1.0256 | 0.304   | 0.0468 | 1.03E-10 |
| 9 | rs10793962 | 136129115 | A | T | 0.0964 | 1.0192 | 0.304   | 0.0472 | 1.51E-10 |
| 9 | rs8176743  | 136131415 | C | T | 0.0972 | 1.0342 | 0.2995  | 0.0467 | 1.84E-10 |
| 9 | rs557317   | 136157037 | A | C | 0.2593 | 0.9977 | -0.2031 | 0.0318 | 2.03E-10 |
| 9 | rs12554336 | 136128663 | A | G | 0.1804 | 0.7103 | -0.2731 | 0.0428 | 2.18E-10 |
| 9 | rs8176736  | 136131785 | C | T | 0.795  | 0.8452 | 0.2376  | 0.0374 | 2.65E-10 |
| 9 | rs8176737  | 136131783 | C | T | 0.2073 | 0.8553 | -0.2349 | 0.037  | 2.79E-10 |
| 9 | rs547495   | 136134995 | C | T | 0.7408 | 0.9589 | 0.2049  | 0.0324 | 3.15E-10 |
| 9 | rs626035   | 136134994 | G | T | 0.7406 | 0.9579 | 0.2048  | 0.0324 | 3.28E-10 |
| 9 | rs8176693  | 136137657 | C | T | 0.0916 | 0.9975 | 0.3057  | 0.0486 | 3.77E-10 |
| 9 | rs8176728  | 136132561 | C | G | 0.7607 | 1.009  | 0.2036  | 0.0323 | 3.78E-10 |

|   |            |           |   |   |        |        |         |        |          |
|---|------------|-----------|---|---|--------|--------|---------|--------|----------|
| 9 | rs8176672  | 136142185 | C | T | 0.0915 | 0.9823 | 0.3082  | 0.049  | 3.85E-10 |
| 9 | rs62641783 | 136130653 | C | G | 0.895  | 0.3699 | 0.4669  | 0.0743 | 4.08E-10 |
| 9 | rs62574567 | 136128421 | C | G | 0.2412 | 1.0101 | -0.2013 | 0.0322 | 5.19E-10 |
| 9 | rs58081338 | 136128329 | C | T | 0.7604 | 0.9996 | 0.2024  | 0.0325 | 5.60E-10 |
| 9 | rs10901253 | 136128772 | C | T | 0.7596 | 1.021  | 0.2     | 0.0321 | 5.72E-10 |
| 9 | rs4962114  | 136129611 | A | G | 0.7604 | 1.0162 | 0.2007  | 0.0322 | 5.72E-10 |
| 9 | rs11244053 | 136129360 | A | G | 0.2379 | 1.0068 | -0.2021 | 0.0324 | 5.73E-10 |
| 9 | rs4962115  | 136129642 | G | T | 0.7628 | 1.0028 | 0.2027  | 0.0325 | 5.73E-10 |
| 9 | rs4962116  | 136129716 | A | G | 0.7596 | 1.021  | 0.1999  | 0.0321 | 5.74E-10 |
| 9 | rs8176644  | 136149150 | C | T | 0.0899 | 0.9712 | 0.3069  | 0.0496 | 7.39E-10 |
| 9 | rs8176662  | 136144454 | A | G | 0.0899 | 0.9718 | 0.3069  | 0.0496 | 7.42E-10 |
| 9 | rs8176671  | 136142313 | A | C | 0.0896 | 0.9722 | 0.3065  | 0.0496 | 8.02E-10 |
| 9 | rs549331   | 136135195 | C | G | 0.2504 | 1.005  | -0.1968 | 0.032  | 9.87E-10 |
| 9 | rs663054   | 136146920 | G | T | 0.2623 | 0.9726 | -0.1958 | 0.0319 | 9.98E-10 |
| 9 | rs624601   | 136135365 | A | G | 0.75   | 1.0078 | 0.1963  | 0.032  | 1.06E-09 |
| 9 | rs638756   | 136134472 | A | C | 0.2474 | 1.0213 | -0.1953 | 0.0319 | 1.13E-09 |
| 9 | rs672316   | 136138125 | G | T | 0.737  | 1.0015 | 0.1916  | 0.0314 | 1.32E-09 |
| 9 | rs575259   | 136135752 | A | G | 0.2469 | 1.0123 | -0.1948 | 0.0321 | 1.54E-09 |
| 9 | rs2073825  | 136132707 | A | T | 0.2357 | 1.0276 | -0.1909 | 0.0322 | 3.59E-09 |
| 9 | rs8176732  | 136132303 | A | G | 0.236  | 1.0302 | -0.19   | 0.0321 | 4.01E-09 |
| 9 | rs8176740  | 136131472 | A | T | 0.2358 | 1.0251 | -0.1902 | 0.0322 | 4.24E-09 |
| 9 | rs12554339 | 136128737 | A | C | 0.2333 | 0.9898 | -0.1942 | 0.0329 | 4.38E-09 |
| 9 | rs11244052 | 136129125 | A | C | 0.7676 | 0.9855 | 0.1949  | 0.0331 | 4.40E-09 |
| 9 | rs8176748  | 136131289 | C | T | 0.2351 | 1.0162 | -0.1906 | 0.0324 | 4.78E-09 |
| 9 | rs625593   | 136135096 | A | G | 0.7483 | 0.9801 | 0.1895  | 0.0323 | 5.37E-09 |
| 9 | rs8176745  | 136131347 | A | G | 0.765  | 1.0272 | 0.1888  | 0.0322 | 5.55E-09 |
| 9 | rs579622   | 136136242 | A | G | 0.7538 | 1.0099 | 0.1874  | 0.0321 | 6.21E-09 |
| 9 | rs626792   | 136134864 | A | C | 0.244  | 1.0214 | -0.1867 | 0.032  | 6.34E-09 |
| 9 | rs547643   | 136135047 | C | T | 0.2438 | 1.0228 | -0.1866 | 0.032  | 6.47E-09 |
| 9 | rs579483   | 136136196 | A | T | 0.755  | 1.0156 | 0.1867  | 0.0321 | 6.67E-09 |
| 9 | rs551322   | 136135444 | A | G | 0.2445 | 1.0195 | -0.1855 | 0.032  | 8.14E-09 |
| 9 | rs8176714  | 136133178 | A | G | 0.7593 | 0.998  | 0.188   | 0.0325 | 8.21E-09 |
| 9 | rs574347   | 136135659 | C | T | 0.7562 | 1.0233 | 0.1849  | 0.032  | 8.83E-09 |
| 9 | rs549446   | 136135238 | C | T | 0.2438 | 1.0233 | -0.1849 | 0.032  | 8.83E-09 |
| 9 | rs613423   | 136135478 | A | G | 0.7555 | 1.0193 | 0.185   | 0.032  | 8.84E-09 |
| 9 | rs2073828  | 136137140 | A | G | 0.6201 | 1.0146 | 0.1661  | 0.0288 | 8.94E-09 |
| 9 | rs8176690  | 136138317 | A | G | 0.3732 | 1.0261 | -0.165  | 0.0287 | 1.02E-08 |
| 9 | rs596141   | 136144689 | G | T | 0.2408 | 0.9823 | -0.188  | 0.0327 | 1.04E-08 |
| 9 | rs12554595 | 136128664 | C | T | 0.83   | 0.6654 | 0.2598  | 0.0452 | 1.06E-08 |
| 9 | rs8176727  | 136132570 | A | G | 0.7677 | 1.0096 | 0.1876  | 0.0327 | 1.08E-08 |
| 9 | rs1752339  | 136141135 | C | T | 0.7574 | 1.001  | 0.1858  | 0.0324 | 1.08E-08 |

|   |            |           |   |   |        |        |         |        |          |
|---|------------|-----------|---|---|--------|--------|---------|--------|----------|
| 9 | rs551100   | 136146740 | C | T | 0.2414 | 1.005  | -0.1855 | 0.0323 | 1.11E-08 |
| 9 | rs62574565 | 136128259 | A | G | 0.769  | 0.9668 | 0.1916  | 0.0334 | 1.16E-08 |
| 9 | rs8176718  | 136132957 | C | T | 0.2404 | 1.0259 | -0.1837 | 0.032  | 1.16E-08 |
| 9 | rs8176717  | 136133034 | G | T | 0.2399 | 1.0282 | -0.1833 | 0.032  | 1.23E-08 |
| 9 | rs488775   | 136144534 | A | G | 0.2399 | 1.0151 | -0.184  | 0.0323 | 1.34E-08 |
| 9 | rs517414   | 136134034 | A | G | 0.7588 | 1.0236 | 0.1828  | 0.0321 | 1.36E-08 |
| 9 | rs675201   | 136146466 | A | G | 0.7601 | 1.0142 | 0.1839  | 0.0323 | 1.39E-08 |
| 9 | rs474279   | 136139617 | C | T | 0.2399 | 1.0168 | -0.1837 | 0.0322 | 1.39E-08 |
| 9 | rs2073826  | 136136963 | G | T | 0.3745 | 1.0416 | -0.1621 | 0.0285 | 1.50E-08 |
| 9 | rs2073827  | 136137133 | C | G | 0.6282 | 1.0305 | 0.1631  | 0.0287 | 1.53E-08 |
| 9 | rs574311   | 136144110 | A | G | 0.2395 | 1.0114 | -0.1834 | 0.0323 | 1.62E-08 |
| 9 | rs8176681  | 136139754 | C | T | 0.6247 | 1.011  | 0.1635  | 0.0289 | 1.77E-08 |
| 9 | rs7853989  | 136131592 | C | G | 0.8879 | 1.0005 | -0.2472 | 0.0444 | 2.90E-08 |
| 9 | rs502361   | 136155589 | C | G | 0.7585 | 1.0108 | 0.1789  | 0.0322 | 3.13E-08 |
| 9 | rs1633514  | 136140513 | C | T | 0.2368 | 1.0127 | -0.18   | 0.0324 | 3.20E-08 |
| 9 | rs549443   | 136135237 | A | G | 0.7619 | 1.0073 | 0.1801  | 0.0324 | 3.21E-08 |
| 9 | rs500428   | 136155343 | A | G | 0.7603 | 1.0217 | 0.1779  | 0.0321 | 3.45E-08 |
| 9 | rs9411395  | 136184782 | A | G | 0.2555 | 0.5634 | 0.2362  | 0.0427 | 3.52E-08 |
| 9 | rs3124766  | 136316942 | A | G | 0.8176 | 0.9771 | -0.2019 | 0.0365 | 3.67E-08 |
| 9 | rs493211   | 136136516 | A | G | 0.7611 | 0.9979 | 0.1799  | 0.0326 | 3.73E-08 |
| 9 | rs3124761  | 136339755 | C | T | 0.1897 | 0.885  | 0.2092  | 0.0379 | 3.77E-08 |
| 9 | rs537895   | 136150403 | A | G | 0.7652 | 0.9653 | 0.1838  | 0.0333 | 3.82E-08 |
| 9 | rs663367   | 136153451 | A | G | 0.7606 | 1.0224 | 0.1771  | 0.0321 | 3.97E-08 |
| 9 | rs3094379  | 136334910 | C | T | 0.1887 | 0.9003 | 0.2074  | 0.0376 | 3.99E-08 |
| 9 | rs3124764  | 136329954 | C | T | 0.1833 | 0.9249 | 0.2067  | 0.0375 | 4.03E-08 |
| 9 | rs552148   | 136153481 | C | T | 0.2396 | 1.0232 | -0.1765 | 0.0321 | 4.31E-08 |

**Supplemental Table II.** Prediction performance of the conventional clinical variables, vWF, and *ABO* SNP rs505922 for the risk of recurrent stroke

| Model    | Variables                                                                                                                 | AUC   | Comparison         | NRI (SE) p-value     | IDI (SE) p-value     |
|----------|---------------------------------------------------------------------------------------------------------------------------|-------|--------------------|----------------------|----------------------|
| Original | Conventional clinical variables:<br>age, diabetes status,<br>hypertension, smoking, prior<br>stroke, and treatment groups | 0.635 |                    |                      |                      |
| New 1    | Model 1 + vWF                                                                                                             | 0.648 | New 1 vs. Original | 0.106 (0.035) 0.0028 | 0.004 (0.002) 0.0388 |
| New 2    | Model 1 + rs505922                                                                                                        | 0.643 | New 2 vs. Original | 0.008 (0.029) 0.7772 | 0.001 (0.001) 0.4685 |
| New 3    | Model 1 + vWF + rs505922                                                                                                  | 0.654 | New 3 vs. Original | 0.110 (0.042) 0.0091 | 0.006 (0.002) 0.0137 |

A

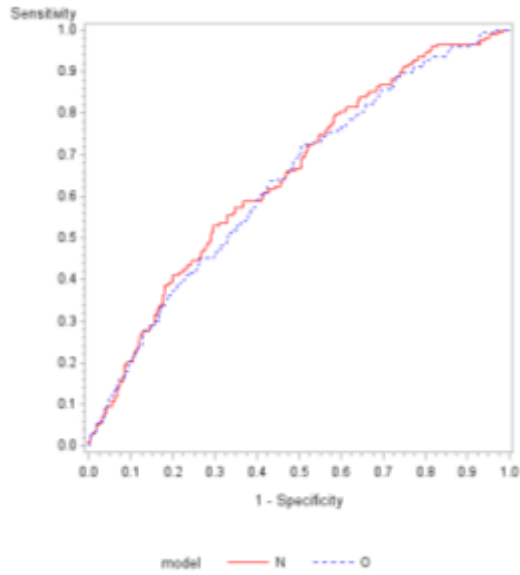

B

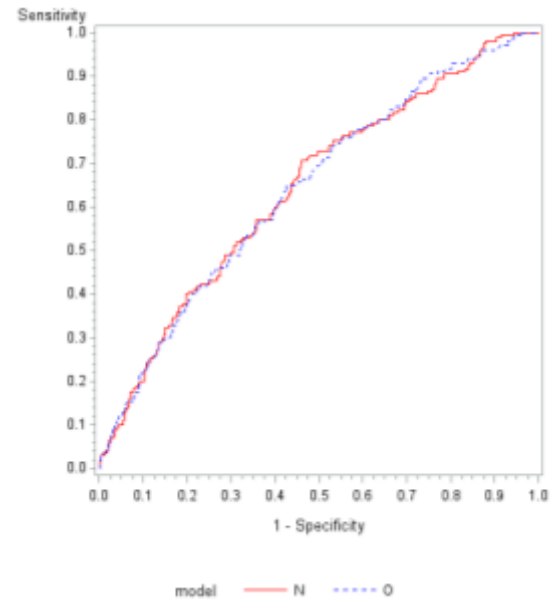

C

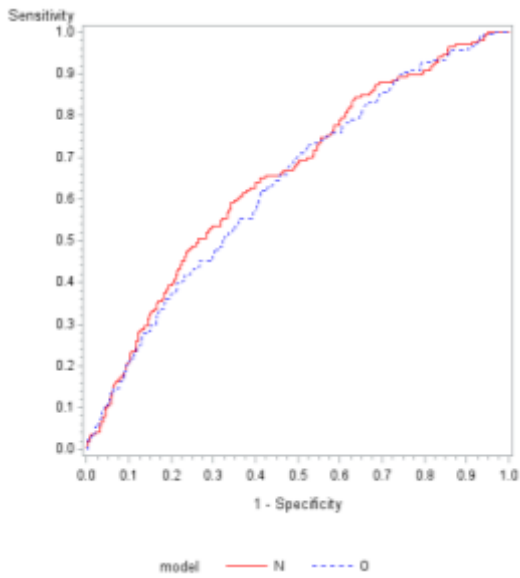

**Supplemental Figure I. ROC curves.** Original model [O] including adjustments for age, diabetes status, hypertension, smoking, prior stroke, and treatment groups vs. the New model [N] including addition of (A) vWF, (B) rs505922, and (C) vWF and rs505922.



**Supplemental Table III. Expanded Association of SNPs identified in current study.**

| Chr | BP        | RS        | PMID     | Author                       | Trait                                          | Gene       | Published p-value | Current Study p-value |
|-----|-----------|-----------|----------|------------------------------|------------------------------------------------|------------|-------------------|-----------------------|
| 9   | 133279294 | rs495828  | 20066004 | Chung CM <sup>1</sup>        | Angiotensin-converting enzyme activity         | ABO        | 3.x10-8           | 2.88x10-17            |
|     |           |           | 24816252 | Shin SY <sup>2</sup>         | Blood metabolite ratios                        | ABO        | 6x10-34           |                       |
|     |           |           | 20139978 | Kamatani Y <sup>3</sup>      | Hematological and biochemical traits           | ABO        | 4x10-59           |                       |
|     |           |           | 20139978 | Kamatani Y <sup>3</sup>      | Red blood cell count                           | ABO        | 3x10-12           |                       |
|     |           |           | 22672568 | Heit JA <sup>4</sup>         | Venous thromboembolism                         | ABO        | 3x10-16           |                       |
|     |           |           | 24262325 | Dichgans M <sup>b</sup>      | Coronary artery disease                        | ABO        | 2x10-7            |                       |
|     |           |           | 24262325 | Dichgans M <sup>b</sup>      | Coronary artery disease or ischemic stroke     | ABO        | 2x10-9            |                       |
|     |           |           | 24262325 | Dichgans M <sup>5</sup>      | Coronary artery disease or large artery stroke | ABO        | 3x10-8            |                       |
|     |           |           | 21378990 | Schunkert H <sup>6</sup>     | Coronary heart disease                         | ABO        | 4x10-14           |                       |
|     |           |           | 22001757 | Chambers JC <sup>7</sup>     | Liver enzyme levels (alkaline phosphatase)     | ABO        | 3x10-123          |                       |
|     |           |           | 23222517 | van der Harst P <sup>8</sup> | Red blood cell traits                          | ABO        | 9x10-18           |                       |
|     |           |           | 19729612 | Paterson AD <sup>9</sup>     | Soluble E-selectin levels                      | ABO        | 1x10-29           |                       |
|     |           |           | 20167578 | Barbalic M <sup>10</sup>     | Soluble levels of adhesion molecules           | ABO        | 2x10-41           |                       |
|     |           |           | 24586186 | Rueedi R <sup>11</sup>       | Urinary metabolites (H-NMR features)           | ABO        | 2x10-32           |                       |
| 9   | 133279871 | rs633862  | 25134534 | Chen K <sup>12</sup>         | Epithelial ovarian cancer                      | SURF6, ABO | 9x10-7            | 9.7x10-16             |
| 9   | 133279427 | rs635634  | 20686565 | Teslovich TM <sup>13</sup>   | Cholesterol, total                             | ABO        | 9x10-21           | 2.6x10-20             |
|     |           |           | 20686565 | Teslovich TM <sup>13</sup>   | LDL cholesterol                                | ABO        | 8x10-22           |                       |
| 9   | 133278860 | rs649129  | 24816252 | Shin SY <sup>2</sup>         | Blood metabolite ratios                        | ABO        | 9x10-37           | 2.76x10-17            |
|     |           |           | 20167578 | Barbalic M <sup>10</sup>     | Soluble levels of adhesion molecules           | ABO        | 1x10-15           |                       |
| 9   | 133278431 | rs651007  | 23381943 | Williams FM <sup>14</sup>    | End-stage coagulation                          | ABO        | 2x10-25           | 2.6x10-17             |
|     |           |           | 20147318 | Qi L <sup>15</sup>           | E-selectin levels                              | ABO        | 2x10-82           |                       |
|     |           |           | 25352340 | Benyamin B <sup>16</sup>     | Iron status biomarkers (ferritin levels)       | ABO        | 1x10-8            |                       |
|     |           |           | 21909109 | Kim YJ <sup>17</sup>         | Metabolite levels                              | ABO        | 6x10-9            |                       |
|     |           |           | 24094242 | Li J <sup>18</sup>           | Serum alkaline phosphatase levels              | SURF6, ABO | 1x10-56           |                       |
| 9   | 133262254 | rs8176693 | 25552591 | Lieb W <sup>19</sup>         | Endothelial growth factor levels               | ABO        | 2x10-33           | 3.77x10-10            |
|     |           |           | 25028398 | Weiss FU <sup>20</sup>       | High serum lipase activity                     | ABO        | 1x10-22           |                       |
|     |           |           | 25028398 | Weiss FU <sup>20</sup>       | Serum lipase activity                          | ABO        | 1x10-30           |                       |

|   |           |           |          |                         |                                                      |     |                      |                        |
|---|-----------|-----------|----------|-------------------------|------------------------------------------------------|-----|----------------------|------------------------|
| 9 | 133256074 | rs8176741 | 24941225 | Liang Y <sup>21</sup>   | Elevated serum<br>carcinoembryonic antigen<br>levels | ABO | 2x10 <sup>-24</sup>  | 7.14x10 <sup>-11</sup> |
| 9 | 133256028 | rs8176743 | 25173106 | Hysi PG <sup>22</sup>   | Intraocular pressure                                 | ABO | 3x10 <sup>-11</sup>  | 1.84x10 <sup>-10</sup> |
| 9 | 133255935 | rs8176746 | 20139978 | Kamatani Y <sup>3</sup> | Mean corpuscular hemoglobin<br>concentration         | ABO | 4x10 <sup>-8</sup>   | 9.24x10 <sup>-11</sup> |
| 9 | 133255801 | rs8176749 | 23300138 | He M <sup>23</sup>      | Tumor biomarkers                                     | ABO | 7x10 <sup>-105</sup> | 9.24x10 <sup>-11</sup> |

## Online Supplement References

1. Chung C-M, Wang R-Y, Chen J-W, Fann CSJ, Leu H-B, Ho H-Y, et al. A genome-wide association study identifies new loci for ACE activity: potential implications for response to ACE inhibitor. *Pharmacogenomics J.* 2010;10:537–544.
2. Shin S-Y, Fauman EB, Petersen A-K, Krumsiek J, Santos R, Huang J, et al. An atlas of genetic influences on human blood metabolites. *Nat. Genet.* 2014; 46:543–550.
3. Kamatani Y, Matsuda K, Okada Y, Kubo M, Hosono N, Daigo Y, et al. Genome-wide association study of hematological and biochemical traits in a Japanese population. *Nat. Genet.* 2010;42:210–215.
4. HEIT JA, ARMASU SM, ASMANN YW, CUNNINGHAM JM, MATSUMOTO ME, PETERSON TM, et al. A genome-wide association study of venous thromboembolism identifies risk variants in chromosomes 1q24.2 and 9q. *J. Thromb. Haemost.* 2012;10:1521–1531.
5. Dichgans M, Malik R, König IR, Rosand J, Clarke R, Gretarsdottir S, et al. Shared Genetic Susceptibility to Ischemic Stroke and Coronary Artery Disease. *Stroke.* 2013;45.
6. Schunkert H, König IR, Kathiresan S, Reilly MP, Assimes TL, et al. Large-scale association analysis identifies 13 new susceptibility loci for coronary artery disease. *Nat. Genet.* 2011; 43:333– 338.
7. Chambers JC, Zhang W, Sehmi J, Li X, Wass MN, Van der Harst P, et al. *Nat. Genet.* 2011;43:1131–1138.

8. van der Harst P, Zhang W, Mateo Leach I, Rendon A, Verweij N, Sehmi J, et al. *Nature*. 2012;492:369–375.
9. Paterson AD, Lopes-Virella MF, Waggott D, Boright AP, Hosseini SM, Carter RE, et al. Genome-wide association identifies the ABO blood group as a major locus associated with serum levels of soluble E-selectin. *Arterioscler. Thromb. Vasc. Biol.* 2009;29:1958–1967.
10. Barbalic M, Dupuis J, Dehghan A, Bis JC, Hoogeveen RC, Schnabel RB, et al. Large-scale genomic studies reveal central role of ABO in sP-selectin and sICAM-1 levels. *Hum. Mol. Genet.* 2010;19:1863–72.
11. Rueedi R, Ledda M, Nicholls AW, Salek RM, Marques-Vidal P, Morya E, et al. Genome-Wide Association Study of Metabolic Traits Reveals Novel Gene-Metabolite-Disease Links. *PLoS Genet.* 2014;10:e1004132.
12. Chen K, Ma H, Li L, Zang R, Wang C, Song F, et al. Genome-wide association study identifies new susceptibility loci for epithelial ovarian cancer in Han Chinese women. *Nat. Commun.* 2014;5:4682.
13. Teslovich TM, Musunuru K, Smith A V., Edmondson AC, Stylianou IM, Koseki M, et al. Biological, clinical and population relevance of 95 loci for blood lipids. *Nature*. 2010;466:707–713.
14. Williams FMK, Carter AM, Hysi PG, Surdulescu G, Hodgkiss D, Soranzo N, et al. Ischemic stroke is associated with the ABO locus: the EuroCLOT study. *Ann. Neurol.* 2013;73:16–31.

15. Qi L, Cornelis MC, Kraft P, Jensen M, van Dam RM, Sun Q, et al. Genetic variants in ABO blood group region, plasma soluble E-selectin levels and risk of type 2 diabetes. *Hum. Mol. Genet.* 2010;19:1856–62.
16. Benyamin B, Esko T, Ried JS, Radhakrishnan A, Vermeulen SH, Traglia M, et al. Novel loci affecting iron homeostasis and their effects in individuals at risk for hemochromatosis. *Nat. Commun.* 2014;5:4926.
17. Kim YJ, Go MJ, Hu C, Hong CB, Kim YK, Lee JY, et al. Large-scale genome-wide association studies in east Asians identify new genetic loci influencing metabolic traits. *Nat. Genet.* 2011;43:990–995.
18. Li J, Gui L, Wu C, He Y, Zhou L, Guo H, et al. Genome-wide association study on serum alkaline phosphatase levels in a Chinese population. *BMC Genomics.* 2013;14:684.
19. Lieb W, Chen M-H, Larson MG, Safa R, Teumer A, Baumeister SE, et al. Genome-wide association study for endothelial growth factors. *Circ. Cardiovasc. Genet.* 2015;8:389–97.
20. Weiss FU, Schurmann C, Guenther A, Ernst F, Teumer A, Mayerle J, et al. Fucosyltransferase 2 (FUT2) non-secretor status and blood group B are associated with elevated serum lipase activity in asymptomatic subjects, and an increased risk for chronic pancreatitis: a genetic association study. *Gut.* 2015;64:646– 56.
21. Liang Y, Tang W, Huang T, Gao Y, Tan A, Yang X, et al. Genetic Variations Affecting Serum Carcinoembryonic Antigen Levels and Status of Regional Lymph Nodes in Patients with Sporadic Colorectal Cancer from Southern China. *PLoS One.* 2014;9:e97923.

22. Hysi PG, Cheng C-Y, Springelkamp H, Macgregor S, Bailey JNC, Wojciechowski R, et al. Genome-wide analysis of multi-ancestry cohorts identifies new loci influencing intraocular pressure and susceptibility to glaucoma. *Nat. Genet.* 2014;46:1126–1130.
  
23. He M, Wu C, Xu J, Guo H, Yang H, Zhang X, et al. A genome wide association study of genetic loci that influence tumour biomarkers cancer antigen 19-9, carcinoembryonic antigen and  $\alpha$  fetoprotein and their associations with cancer risk. *Gut* [Internet]. 2014 [cited 2016 Oct 13];63:143–51. Available from: <http://www.ncbi.nlm.nih.gov/pubmed/23300138>
